# Supplementary material
Source: MDPI journal article supplement (https://www.mdpi.com/2311-5637/8/2/83)
Supplement: s1 [file s1]

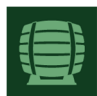

## Supplementary Materials:

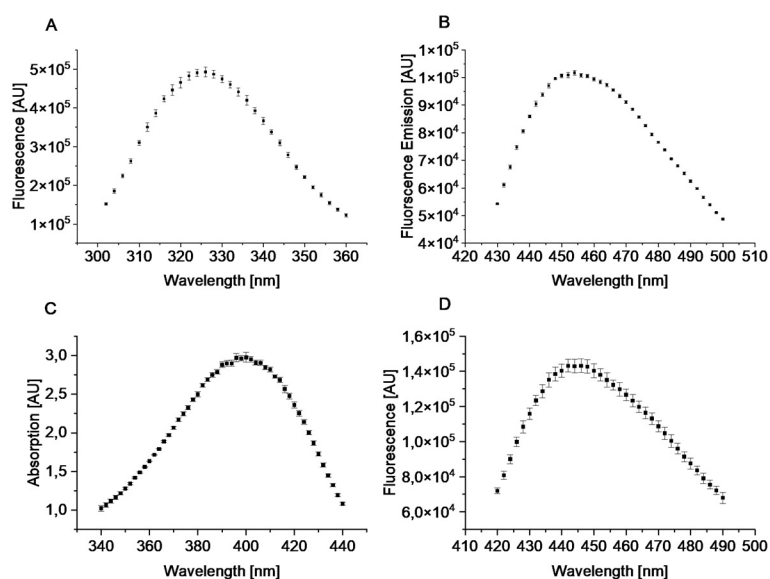

**Figure S1.** Fluorescence emission and absorption spectra of the investigated surrogate substrates in case of arbutin (A) and esculin (B) or the conversion products pNP (C) and 4-MU (D). Fluorescence was measured after excitation at the excitation maximum wavelength determined in the experiments. Experiments were conducted in triplicates. The values represent the mean values of three experiments and respective standard deviations.
